# Supplementary material
Source: PubMed Central journal article supplement (PMC7655769)
Supplement: rspa20200508_review_history.pdf [file rspa20200508_review_history.pdf]

## Improved phase-field models of melting and dissolution in multi-component flows

Eric W. Hester, Louis-Alexandre Couston, Benjamin Favier, Keaton J. Burns and Geoffrey M. Vasil

### Article citation details

*Proc. R. Soc. A* **476**: 20200508.

<http://dx.doi.org/10.1098/rspa.2020.0508>

### Review timeline

Original submission: 29 June 2020  
Revised submission: 18 September 2020  
Final acceptance: 23 September 2020

Note: Reports are unedited and appear as submitted by the referee. The review history appears in chronological order.

## Review History

RSPA-2020-0508.R0 (Original submission)

Review form: Referee 1

**Is the manuscript an original and important contribution to its field?**

Good

**Is the paper of sufficient general interest?**

Good

**Is the overall quality of the paper suitable?**

Good

**Can the paper be shortened without overall detriment to the main message?**

Yes

**Do you think some of the material would be more appropriate as an electronic appendix?**

No

**Do you have any ethical concerns with this paper?**

No

**Recommendation?**

Accept with minor revision (please list in comments)

**Comments to the Author(s)**

In this paper, Authors present an extension of the phase field approach to investigate on melting and dissolution at interfaces.

The paper is well written and well presented and pushes forward the application of the phase field method.

I am personally interested in expanding the possibilities of the Phase Field method, which should sometimes be referred to as interface capturing methods.

I have just few minor comments.

Authors refer to the thickness of the interface as epsilon. In literature, the dimensionless thickness of the interface is usually called the Cahn number (the ratio of the thickness to the system macroscopic scale).

Perhaps a clarification?

Authors can refer to the following papers:

G.Soligo, A. Roccon, and A. Soldati, (2019) Breakage, coalescence and size distribution of surfactant-laden droplets in turbulent flow *J. Fluid Mech.*, 881, 244–282 F. Magaletti, F. Picano, M. Chinappi, L., Marino, and CM. Casciola, C. M. (2013) The sharp-interface limit of the Cahn–Hilliard/Navier–Stokes model for binary fluids. *J. Fluid Mech.* 714, 95–126.

There are not many instances in which spectral methods are used in connection with Phase Field approaches. This because tackling the space dependent behavior of fluid properties requires specific attention.

Authors could perhaps be interested in discussing Dedalus a bit better, although the code is fully described in the references.

G.Soligo, A. Roccon, and A. Soldati, (2019) Coalescence of surfactant-laden drops by Phase Field Method, *J. Comp. Physics*, 376, 1292–1311

**Review form: Referee 2****Is the manuscript an original and important contribution to its field?**

Excellent

**Is the paper of sufficient general interest?**

Good

**Is the overall quality of the paper suitable?**

Excellent

**Can the paper be shortened without overall detriment to the main message?**

Yes

**Do you think some of the material would be more appropriate as an electronic appendix?**

No

**Do you have any ethical concerns with this paper?**

No

**Recommendation?**

Accept with minor revision (please list in comments)

**Comments to the Author(s)**

The manuscript deals with convergence of the phase-field model. It is well known that there is a drawback in the phase-field model caused by the diffusive interface. That is, numerical solution of phase-field model strongly depends on the interface thickness. Although many quantitative phase-field models are proposed to avoid this problem, there exist asymptotic argument in the most of models. In this study, the authors investigated this problem. They developed second-order phase-field model of melting and dissolution in multi-component flows. Then, asymptotic argument in the proposed model is validated by two benchmark problems: melting and dissolution at a stagnation point and double diffusive melting, which is highly appreciated. Therefore, I recommend this manuscript for publication in Proceedings of the Royal Society A.

I have one question. In general, physical meaning of the phase-field model is guaranteed by the variational formulation from Ginzburg-Landau type free energy. On the other hand, equation (2.4) in this study is given in the heuristic manner on behalf of variational formulation. It is not clear for me how the mathematical strictness guaranties the physical rigor. I would be grateful if the authors could comment on this point.

**Decision letter (RSPA-2020-0508.R0)**

17-Sep-2020

Dear Mr Hester,

On behalf of the Editor, I am pleased to inform you that your Manuscript RSPA-2020-0508 entitled "Improved phase-field models of melting and dissolution in multi-component flows" has been accepted for publication subject to minor revisions in Proceedings A. Please find the referees' comments below.

The reviewer(s) have recommended publication, but also suggest some minor revisions to your manuscript. Therefore, I invite you to respond to the reviewer(s)' comments and revise your manuscript. Please note that we have a strict upper limit of 28 pages for each paper. Please endeavour to incorporate any revisions while keeping the paper within journal limits. Please note that page charges are made on all papers longer than 20 pages. If you cannot pay these charges you must reduce your paper to 20 pages before submitting your revision. Your paper has been ESTIMATED to be 21 pages. We cannot proceed with typesetting your paper without your agreement to meet page charges in full should the paper exceed 20 pages when typeset. If you have any questions, please do get in touch.

It is a condition of publication that you submit the revised version of your manuscript within 7 days. If you do not think you will be able to meet this date please let me know in advance of the due date.

To revise your manuscript, log into <https://mc.manuscriptcentral.com/prsa> and enter your Author Centre, where you will find your manuscript title listed under "Manuscripts with Decisions." Under "Actions," click on "Create a Revision." Your manuscript number has been appended to denote a revision.

You will be unable to make your revisions on the originally submitted version of the manuscript. Instead, revise your manuscript and upload a new version through your Author Centre.

When submitting your revised manuscript, you will be able to respond to the comments made by the referee(s) and upload a file "Response to Referees" in "Section 6 - File Upload". You can use this to document any changes you make to the original manuscript. In order to expedite the processing of the revised manuscript, please be as specific as possible in your response to the referee(s).

**IMPORTANT:** Your original files are available to you when you upload your revised manuscript. Please delete any redundant files before completing the submission process.

In addition to addressing all of the reviewers' and editor's comments, your revised manuscript **MUST** contain the following sections before the reference list (for any heading that does not apply to your work, please include a comment to this effect):

- Acknowledgements
- Funding statement

See <https://royalsociety.org/journals/authors/author-guidelines/> for further details.

When uploading your revised files, please make sure that you include the following as we cannot proceed without these:

- 1) A text file of the manuscript (doc, txt, rtf or tex), including the references, tables (including captions) and figure captions. Please remove any tracked changes from the text before submission. PDF files are not an accepted format for the "Main Document".
- 2) A separate electronic file of each figure (tif, eps or print-quality pdf preferred). The format should be produced directly from original creation package, or original software format.
- 3) Electronic Supplementary Material (ESM): all supplementary materials accompanying an accepted article will be treated as in their final form. Note that the Royal Society will not edit or typeset supplementary material and it will be hosted as provided. Please ensure that the supplementary material includes the paper details where possible (authors, article title, journal name). Supplementary files will be published alongside the paper on the journal website and posted on the online figshare repository (<https://figshare.com>). The heading and legend provided for each supplementary file during the submission process will be used to create the figshare page, so please ensure these are accurate and informative so that your files can be found in searches. Files on figshare will be made available approximately one week before the accompanying article so that the supplementary material can be attributed a unique DOI. Alternatively you may upload a zip folder containing all source files for your manuscript as described above with a PDF as your "Main Document". This should be the full paper as it appears when compiled from the individual files supplied in the zip folder.

#### Article Funder

Please ensure you fill in the Article Funder question on page 2 to ensure the correct data is collected for FundRef (<http://www.crossref.org/fundref/>).

#### Media summary

Please ensure you include a short non-technical summary (up to 100 words) of the key findings/importance of your paper. This will be used for to promote your work and marketing purposes (e.g. press releases). The summary should be prepared using the following guidelines:

\*Write simple English: this is intended for the general public. Please explain any essential technical terms in a short and simple manner.

\*Describe (a) the study (b) its key findings and (c) its implications.

\*State why this work is newsworthy, be concise and do not overstate (true 'breakthroughs' are a rarity).

\*Ensure that you include valid contact details for the lead author (institutional address, email address, telephone number).

#### Cover images

We welcome submissions of images for possible use on the cover of Proceedings A. Images should be square in dimension and please ensure that you obtain all relevant copyright permissions before submitting the image to us. If you would like to submit an image for consideration please send your image to [proceedingsa@royalsociety.org](mailto:proceedingsa@royalsociety.org)

Once again, thank you for submitting your manuscript to Proceedings A and I look forward to receiving your revision. If you have any questions at all, please do not hesitate to get in touch.

Best wishes  
Raminder Shergill  
[proceedingsa@royalsociety.org](mailto:proceedingsa@royalsociety.org)  
Proceedings A

on behalf of  
Dr Bruno Welfert  
Board Member  
Proceedings A

Reviewer(s)' Comments to Author:

Referee: 1

Comments to the Author(s)

In this paper, Authors present an extension of the phase field approach to investigate on melting and dissolution at interfaces.

The paper is well written and well presented and pushes forward the application of the phase field method.

I am personally interested in expanding the possibilities of the Phase Field method, which should sometimes be referred to as interface capturing methods.

I have just few minor comments.

Authors refer to the thickness of the interface as epsilon. In literature, the dimensionless thickness of the interface is usually called the Cahn number (the ratio of the thickness to the system macroscopic scale).

Perhaps a clarification?

Authors can refer to the following papers:

G.Soligo, A. Roccon, and A. Soldati, (2019) Breakage, coalescence and size distribution of surfactant-laden droplets in turbulent flow J. Fluid Mech., 881, 244–282 F. Magaletti, F. Picano, M. Chinappi, L., Marino, and CM. Casciola, C. M. (2013) The sharp-interface limit of the Cahn-Hilliard/Navier-Stokes model for binary fluids. J. Fluid Mech. 714, 95–126.

There are not many instances in which spectral methods are used in connection with Phase Field approaches. This because tackling the space dependent behavior of fluid properties requires specific attention.

Authors could perhaps be interested in discussing Dedalus a bit better, although the code is fully described in the references.

G.Soligo, A. Roccon, and A. Soldati, (2019) Coalescence of surfactant-laden drops by Phase Field Method, *J. Comp. Physics*, 376, 1292–1311

Referee: 2

Comments to the Author(s)

The manuscript deals with convergence of the phase-field model. It is well known that there is a drawback in the phase-field model caused by the diffusive interface. That is, numerical solution of phase-field model strongly depends on the interface thickness. Although many quantitative phase-field models are proposed to avoid this problem, there exist asymptotic argument in the most of models. In this study, the authors investigated this problem. They developed second-order phase-field model of melting and dissolution in multi-component flows. Then, asymptotic argument in the proposed model is validated by two benchmark problems: melting and dissolution at a stagnation point and double diffusive melting, which is highly appreciated. Therefore, I recommend this manuscript for publication in *Proceedings of the Royal Society A*.

I have one question. In general, physical meaning of the phase-field model is guaranteed by the variational formulation from Ginzburg-Landau type free energy. On the other hand, equation (2.4) in this study is given in the heuristic manner on behalf of variational formulation. It is not clear for me how the mathematical strictness guaranties the physical rigor. I would be grateful if the authors could comment on this point.

## Author's Response to Decision Letter for (RSPA-2020-0508.R0)

See Appendix A.

## Decision letter (RSPA-2020-0508.R1)

23-Sep-2020

Dear Mr Hester

I am pleased to inform you that your manuscript entitled "Improved phase-field models of melting and dissolution in multi-component flows" has been accepted in its final form for publication in *Proceedings A*.

Our Production Office will be in contact with you in due course. You can expect to receive a proof of your article soon. Please contact the office to let us know if you are likely to be away from e-mail in the near future. If you do not notify us and comments are not received within 5 days of sending the proof, we may publish the paper as it stands.

### Open access

You are invited to opt for open access, our author pays publishing model. Payment of open access fees will enable your article to be made freely available via the Royal Society website as soon as it is ready for publication. For more information about open access please visit <https://royalsociety.org/journals/authors/which-journal/open-access/>. The open access fee for this journal is £1700/\$2380/€2040 per article. VAT will be charged where applicable.

Note that if you have opted for open access then payment will be required before the article is published – payment instructions will follow shortly.

If you wish to opt for open access then please inform the editorial office ([proceedingsa@royalsociety.org](mailto:proceedingsa@royalsociety.org)) as soon as possible.

Your article has been estimated as being 21 pages long. Our Production Office will inform you of the exact length at the proof stage.

Proceedings A levies charges for articles which exceed 20 printed pages. (based upon approximately 540 words or 2 figures per page). Articles exceeding this limit will incur page charges of £150 per page or part page, plus VAT (where applicable).

Under the terms of our licence to publish you may post the author generated postprint (ie. your accepted version not the final typeset version) of your manuscript at any time and this can be made freely available. Postprints can be deposited on a personal or institutional website, or a recognised server/repository. Please note however, that the reporting of postprints is subject to a media embargo, and that the status the manuscript should be made clear. Upon publication of the definitive version on the publisher's site, full details and a link should be added.

You can cite the article in advance of publication using its DOI. The DOI will take the form: 10.1098/rspa.XXXX.YYYY, where XXXX and YYYY are the last 8 digits of your manuscript number (eg. if your manuscript number is RSPA-2017-1234 the DOI would be 10.1098/rspa.2017.1234).

For tips on promoting your accepted paper see our blog post: <https://royalsociety.org/blog/2020/07/promoting-your-latest-paper-and-tracking-your-results/>

On behalf of the Editor of Proceedings A, we look forward to your continued contributions to the Journal.

Sincerely,  
Raminder Shergill  
[proceedingsa@royalsociety.org](mailto:proceedingsa@royalsociety.org)

## Appendix A

# Response to Referees

## Referee 1 comments

In this paper, Authors present an extension of the phase field approach to investigate on melting and dissolution at interfaces. The paper is well written and well presented and pushes forward the application of the phase field method. I am personally interested in expanding the possibilities of the Phase Field method, which should sometimes be referred to as interface capturing methods. I have just few minor comments:

Authors refer to the thickness of the interface as epsilon. In literature, the dimensionless thickness of the interface is usually called the Cahn number (the ratio of the thickness to the system macroscopic scale). Perhaps a clarification? Authors can refer to the following papers:

G.Soligo, A. Roccon, and A. Soldati, (2019) Breakage, coalescence and size distribution of surfactant-laden droplets in turbulent flow *J. Fluid Mech.*, 881, 244–282.

F. Magaletti, F. Picano, M. Chinappi, L. Marino, and CM. Casciola, C. M. (2013) The sharp-interface limit of the Cahn–Hilliard/Navier–Stokes model for binary fluids. *J. Fluid Mech.* 714, 95–126.

There are not many instances in which spectral methods are used in connection with Phase Field approaches. This because tackling the space dependent behaviour of fluid properties requires specific attention. Authors could perhaps be interested in discussing Dedalus a bit better, although the code is fully described in the references.

G.Soligo, A. Roccon, and A. Soldati, (2019) Coalescence of surfactant-laden drops by Phase Field Method, *J. Comp. Physics*, 376, 1292–1311

## Response to Referee 1

We thank the referee for their comments. We have added references to the Cahn number in equation 1.1, as well as to the papers suggested. We have also expanded on the numerical methods underlying Dedalus at the start of section 4.



## Referee 2 comments

The manuscript deals with convergence of the phase-field model. It is well known that there is a drawback in the phase-field model caused by the diffusive interface. That is, numerical solution of phase-field model strongly depends on the interface thickness. Although many quantitative phase-field models are proposed to avoid this problem, there exist asymptotic argument in the most of models. In this study, the authors investigated this problem. They developed second-order phase-field model of melting and dissolution in multi-component flows. Then, asymptotic argument in the proposed model is validated by two benchmark problems: melting and dissolution at a stagnation point and double diffusive melting, which is highly appreciated. Therefore, I recommend this manuscript for publication in Proceedings of the Royal Society A.

I have one question. In general, physical meaning of the phase-field model is guaranteed by the variational formulation from Ginzburg-Landau type free energy. On the other hand, equation (2.4) in this study is given in the heuristic manner on behalf of variational formulation. It is not clear for me how the mathematical strictness guarantees the physical rigour. I would be grateful if the authors could comment on this point.

## Response to Referee 2

We thank the referee for their comments. We have added a small discussion of this point at the end of section 2, after introducing the phase-field equations. To summarise our addition: Phase-field models can be derived via variational formalisms, some of which we cite in our fourth bullet point in the introduction (references 34 to 38). However a variational derivation is not required. We emphasise the view of reference 31 (Beckermann et al. 1999), which states “phase-field equations are only quantitatively meaningful in the sharp-interface limit where they can be ultimately related to experiment”. It is our asymptotic derivation, combined with validation in quantitative numerical experiments, that demonstrates the physical accuracy of our model. We hope this clarifies the referees question.
